# Supplementary material for: Transcriptional activity and strain-specific history of mouse pseudogenes
Source: PubMed Central journal article supplement (PMC7392758; doi:10.1038/s41467-020-17157-w), 2020-07-29
Supplement: 41467_2020_17157_MOESM3_ESM.pdf [file 41467_2020_17157_MOESM3_ESM.pdf]

### **Description of Additional Supplementary Files**

File Name: Supplementary Data 1

Description: Unitary pseudogenes in human and mouse. (SupData.1.xlsx also available at <http://mouse.pseudogene.org/Supplement/> )

File Name: Supplementary Data 2

Description: Pseudogene family and clan characterization. (SupData.2.xlsx also available at <http://mouse.pseudogene.org/Supplement/> )

File Name: Supplementary Data 3

Description: Unitary pseudogenes in mouse strains. (SupData.3.xlsx also available at <http://mouse.pseudogene.org/Supplement/> )

File Name: Supplementary Data 4

Description: Encode transcription data. (SupData.4.xlsx also available at <http://mouse.pseudogene.org/Supplement/> )

File Name: Supplementary Data 5

Description: Matrix of enrichment values for Gene Ontology terms in the 18 mouse strains. (SupData.5.xlsx also available at <http://mouse.pseudogene.org/Supplement/> )

File Name: Supplementary Data 6

Description: Transcribed pseudogenes in mouse reference genome. (SupData.6.xlsx also available at <http://mouse.pseudogene.org/Supplement/> )

File Name: Supplementary Data 7

Description: Pangenome pseudogene functional annotation and characterisation dataset. (SupData.7.xlsx also available at <http://mouse.pseudogene.org/Supplement/> )

File Name: Supplementary Data 8

Description: Mouse strains haplotype data. (SupData.8.xlsx also available at <http://mouse.pseudogene.org/Supplement/> )
