# Supplementary material for: Transcriptional activity and strain-specific history of mouse pseudogenes
Source: Nat Commun. 2020 Jul 29;11:3695. doi: 10.1038/s41467-020-17157-w (PMC7392758; doi:10.1038/s41467-020-17157-w)
Supplement: Supplementary file 1 — Supplementary Information [file 41467_2020_17157_MOESM1_ESM.pdf]

# Supplementary Information

## Transcriptional activity and strain-specific history of mouse pseudogenes

Sisu, Muir et al.

### Supplementary Figures

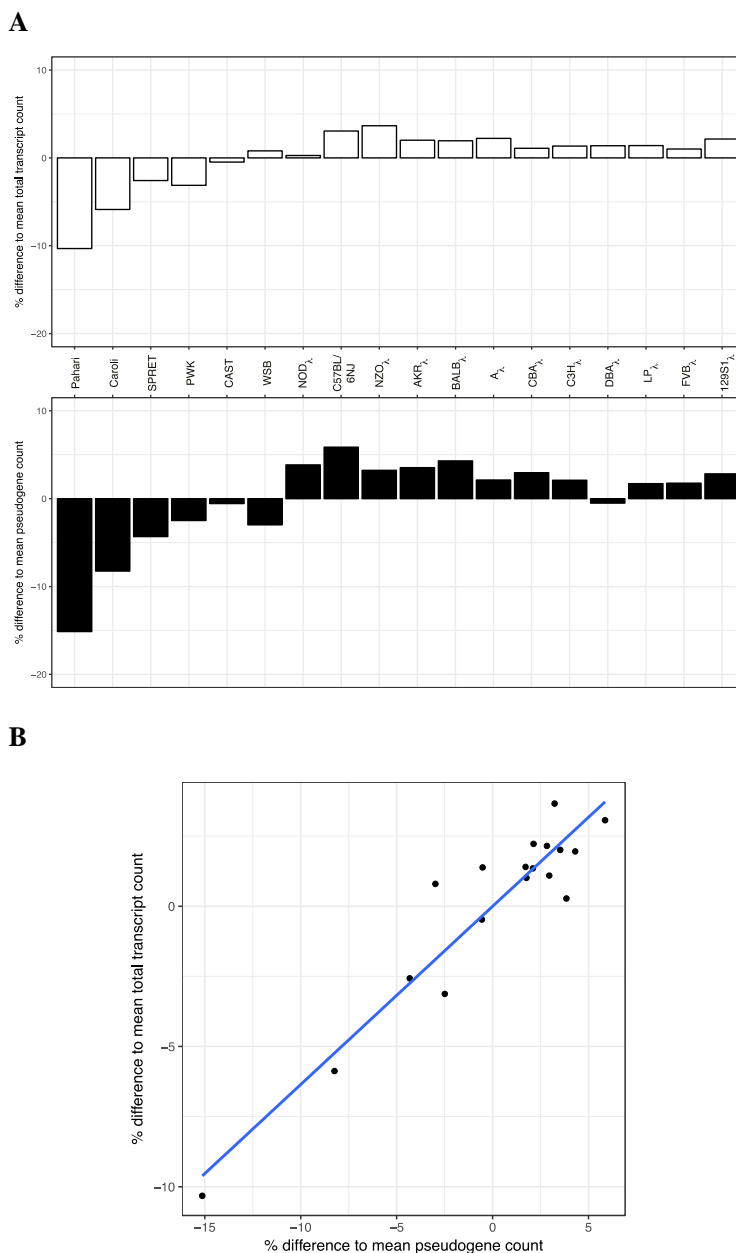

**Supplementary Figure 1.** A – The percentage difference between the number of pseudogene/conserved protein coding transcripts per strain and the average across all strains. Associated data is available from **Supplementary Data 7**. B – Scatterplot of the percentage difference between the number of pseudogene/conserved protein coding transcripts per strain and the average across all strains. Pearson correlation coefficient = 0.94.

**A**

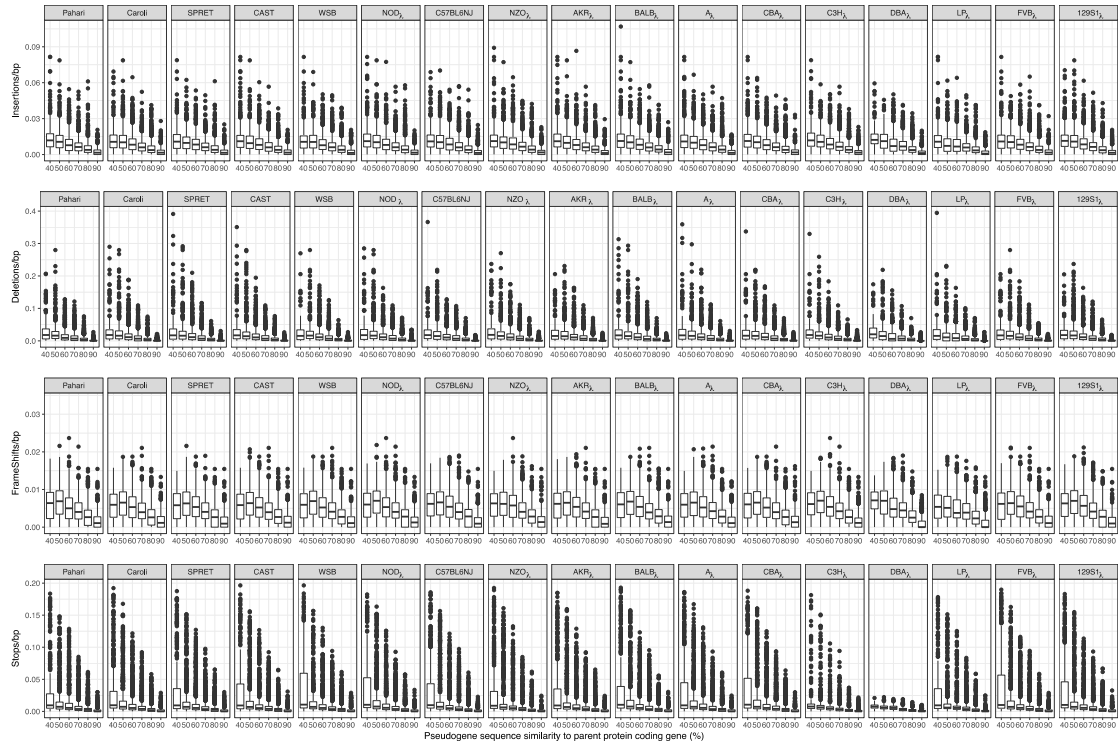

**B**

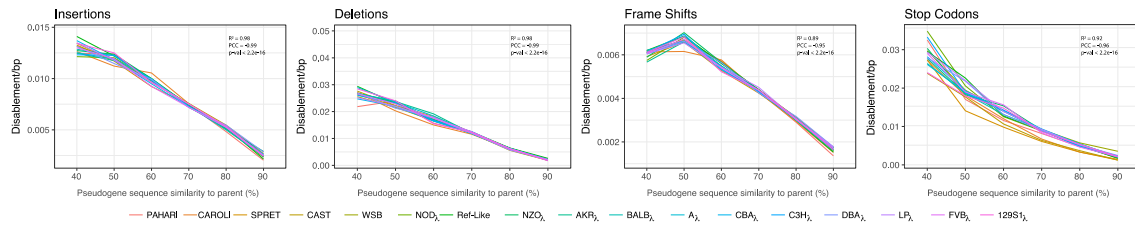

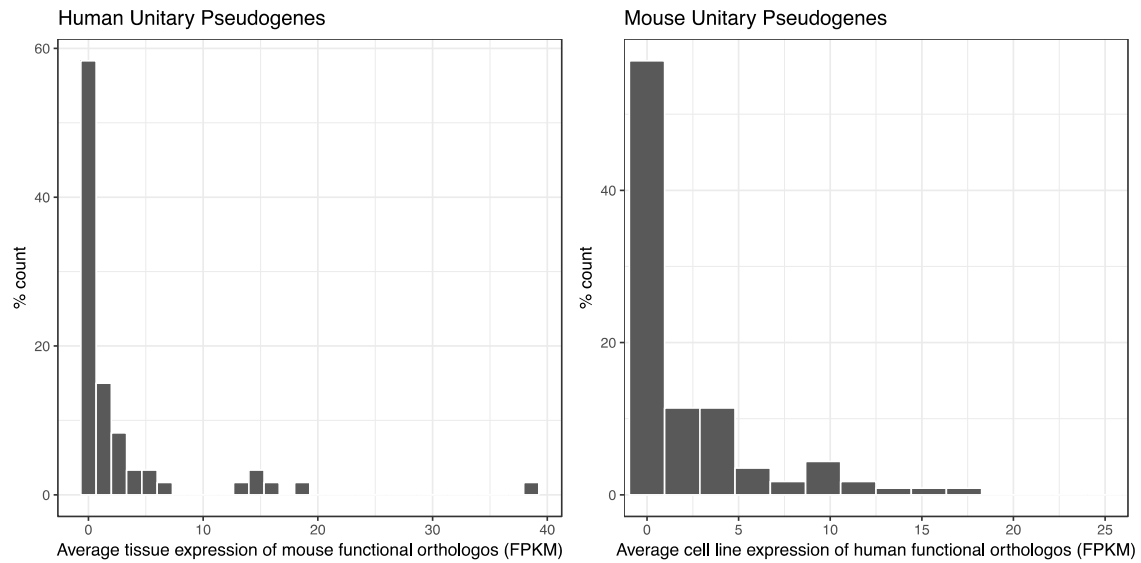

**Supplementary Figure 3. A** – Histogram distribution of expression levels for the functional paralogs of unitary pseudogenes. The left hand graph gives the average tissue (n=18) expression level for the mouse functional paralogs that are pseudogenised in human (n=60), while the right hand graph show the average ENCODE cell line (n=17) expression level for the human functional paralogs that are unitary pseudogenes in mouse (n=114).

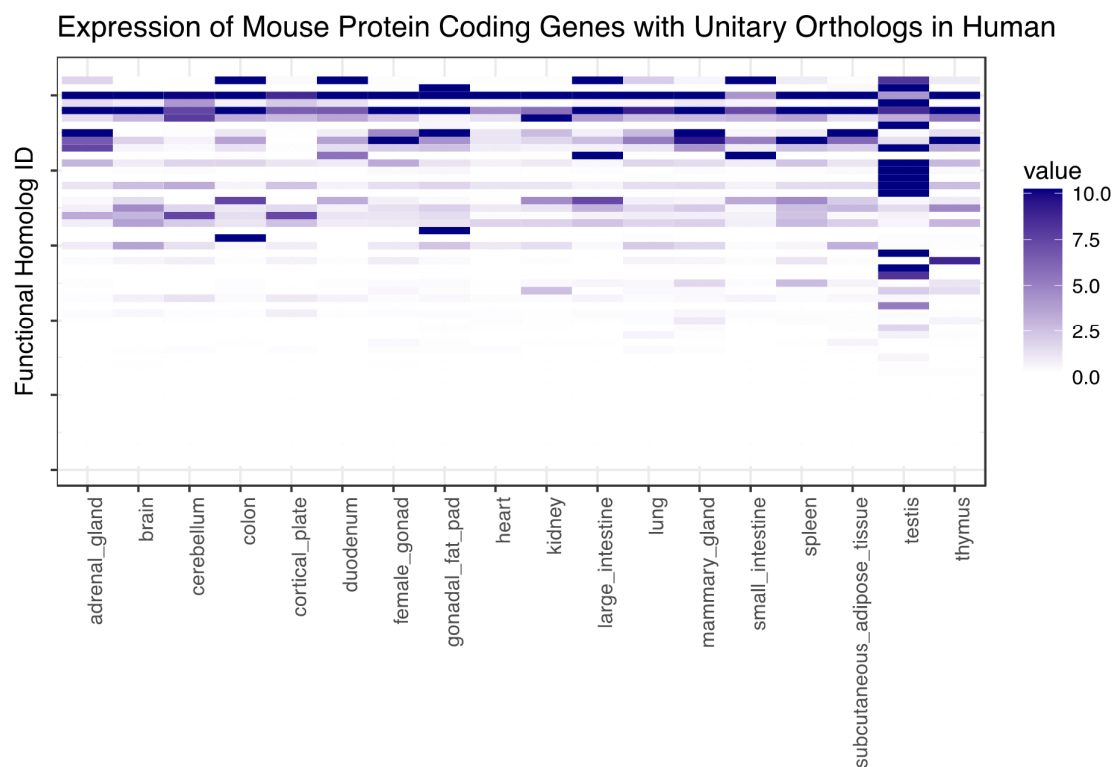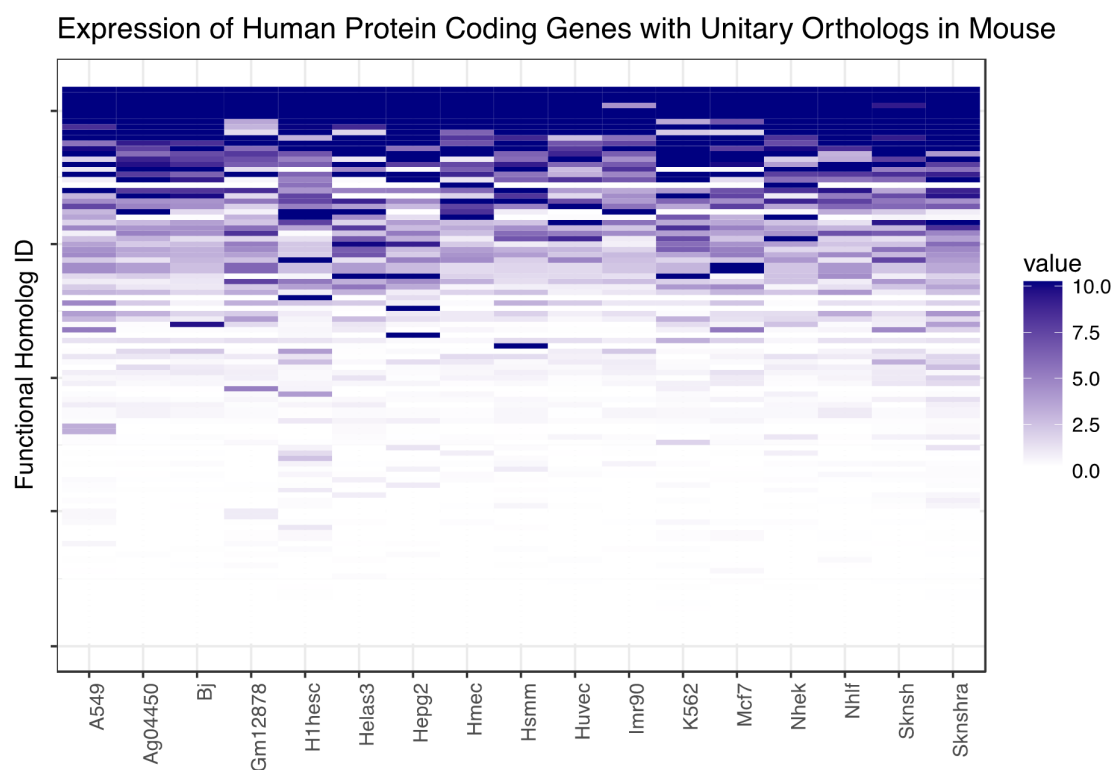

**Supplementary Figure 3. B** – Distribution of expression levels for the functional paralogs of unitary pseudogenes per tissue in mouse (top) and per ENCODE cell line in human(bottom). The colour scale top value corresponds to an expression score of greater or equal to 10 FPKM.

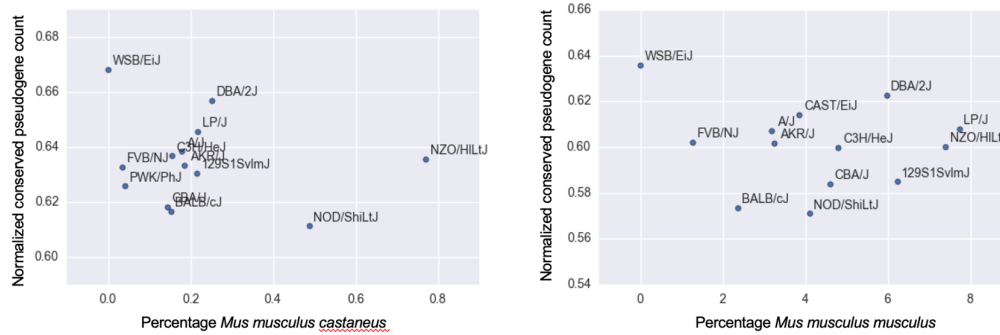

**Supplementary Figure 3. C** – Normalized number of pseudogenes shared between each classical laboratory inbred strain and the wild-derived strains representative of the two *M. musculus* subspecies from which smaller fractions of the classical lab strain genomes are derived (left: CAST/EiJ for *M. m. castaneus* and right: PWK/PhJ for *M. m. musculus*).

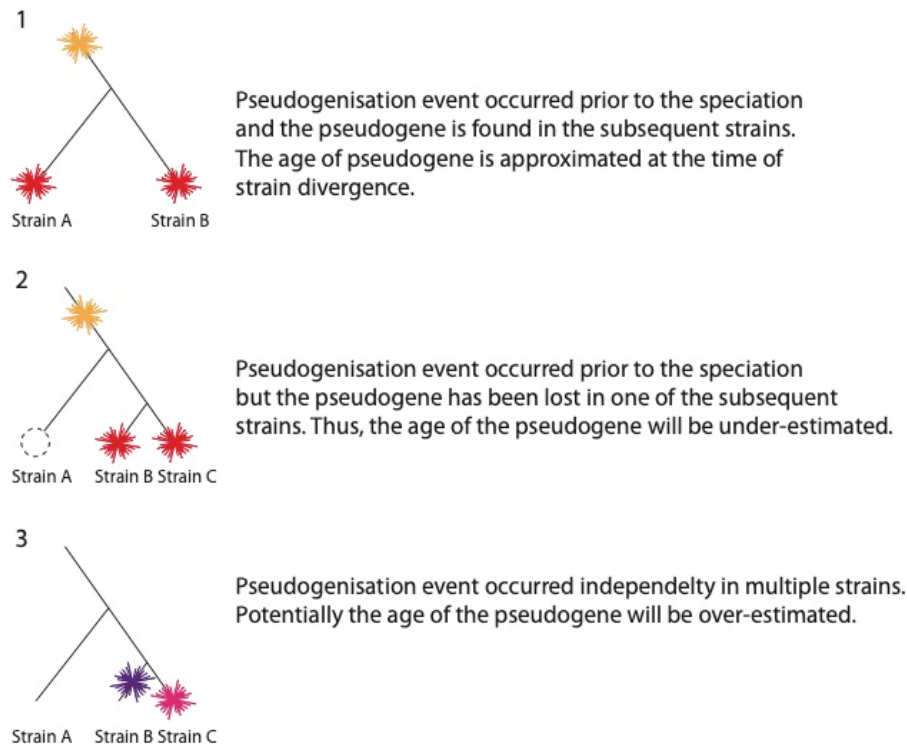

**Supplementary Figure 3. D** – Bias inducing events in estimating the age of pseudogene based on its presence or absence in various strains. The star shape indicates a pseudogenisation event. The dashed circle indicates the loss of the pseudogene in a strain.

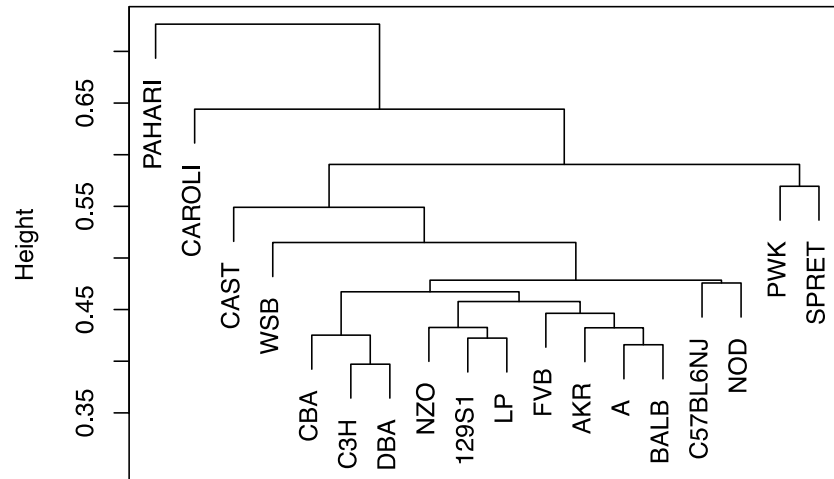

**Supplementary Figure 3. E** – Mouse lineage evolutionary tree based on the presence and absence of orthologous and strain specific pseudogenes across the strains using as input a binary matrix (1-pseudogene is present and 0 –the pseudogene is absent from the strain).

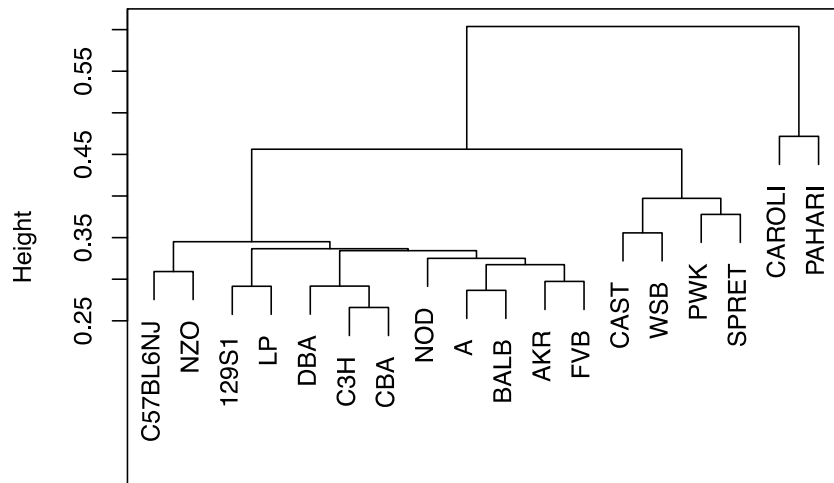

**Supplementary Figure 3. F** – Mouse lineage evolutionary tree based solely on the presence and absence of orthologous pseudogenes across the strains using as input a binary matrix (1-pseudogene is present and 0 –the pseudogene is absent from the strain).

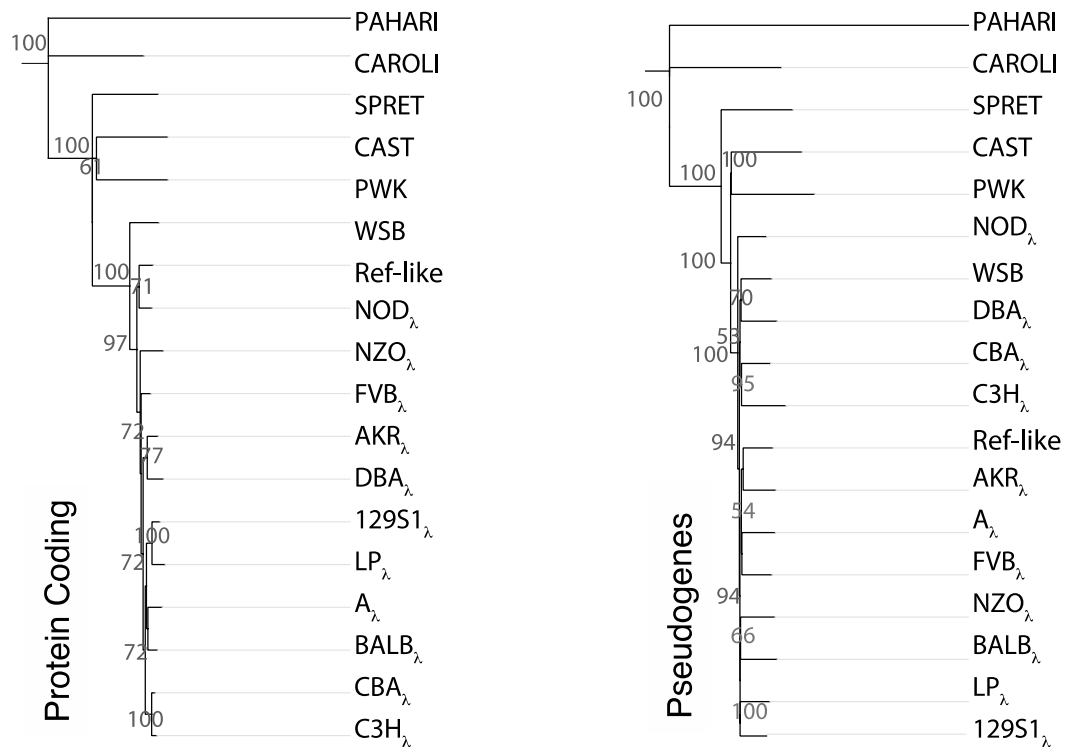

**Supplementary Figure 3. G** – Mirror of **Figure 3C** highlighting the phylogenetic trees of evolutionary conserved pseudogenes and pseudogenes parents with the associated bootstrap values on the branches.

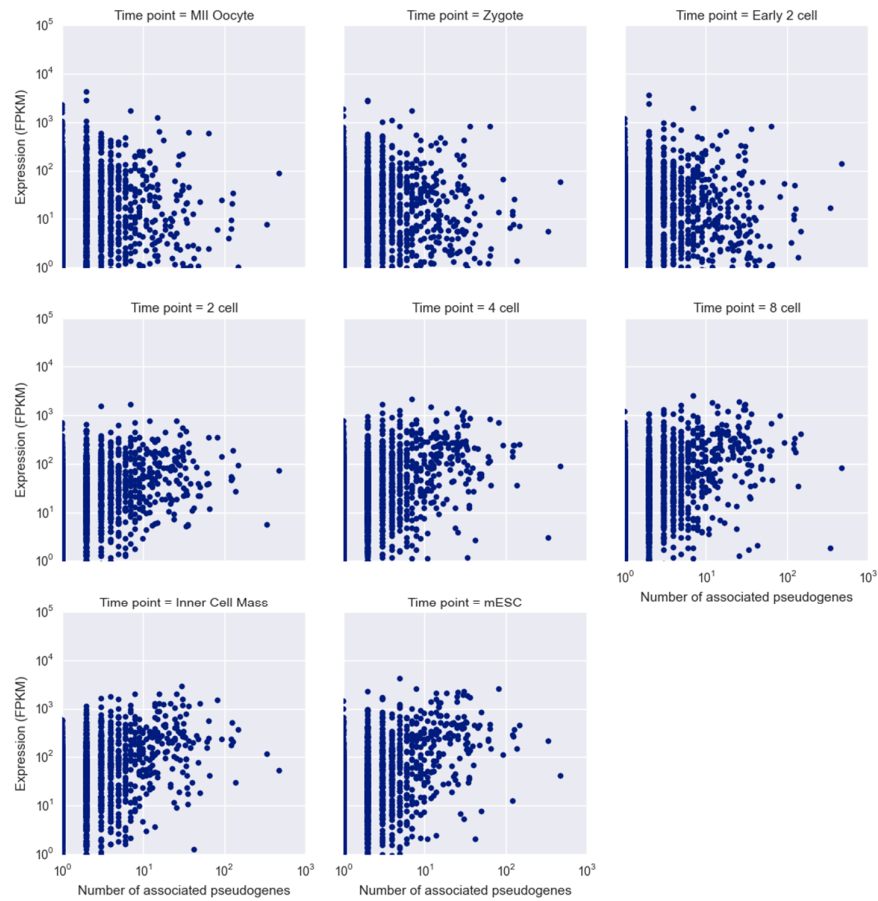

**Supplementary Figure 4. A.** Transcriptional activity of a gene vs the number of its associated pseudogenes at different early embryonic developmental time points.

| All Genes (7,797) |          |                |          | Parent Genes (1,015) |          |                |          |
|-------------------|----------|----------------|----------|----------------------|----------|----------------|----------|
| Embryonic Stage   | Slope    | R <sup>2</sup> | P-Value  | Embryonic Stage      | Slope    | R <sup>2</sup> | P-Value  |
| MIH_oocyte        | 0.000680 | .0004          | 0.0803   | MIH_oocyte           | 0.000195 | 0.000          | 0.930    |
| zygote            | 0.003195 | 0.0027         | 4.72e-06 | zygote               | 0.003353 | 0.001          | 0.281    |
| early_2cell       | 0.003324 | .0029          | 2.30e-06 | early_2cell          | 0.002932 | 0.001          | 0.298    |
| 2cell             | 0.016201 | .0185          | 1.42e-33 | 2cell                | 0.011617 | 0.007          | 0.00634  |
| 4cell             | 0.013029 | .0267          | 7.37e-48 | 4cell                | 0.011475 | 0.015          | 8.63e-05 |
| 8cell             | 0.011471 | .0292          | 3.18e-52 | 8cell                | 0.010365 | 0.018          | 2.30e-05 |
| ICM               | 0.012790 | .0431          | 1.26e-76 | ICM                  | 0.016475 | 0.041          | 6.83e-11 |
| mESC              | 0.012985 | .0477          | 7.24e-85 | mESC                 | 0.015057 | 0.044          | 1.22e-11 |

**Supplementary Figure 4. B.** Regression statistics defining the transcriptional activity of a gene vs the number of its associated pseudogenes at different early embryonic developmental time points.

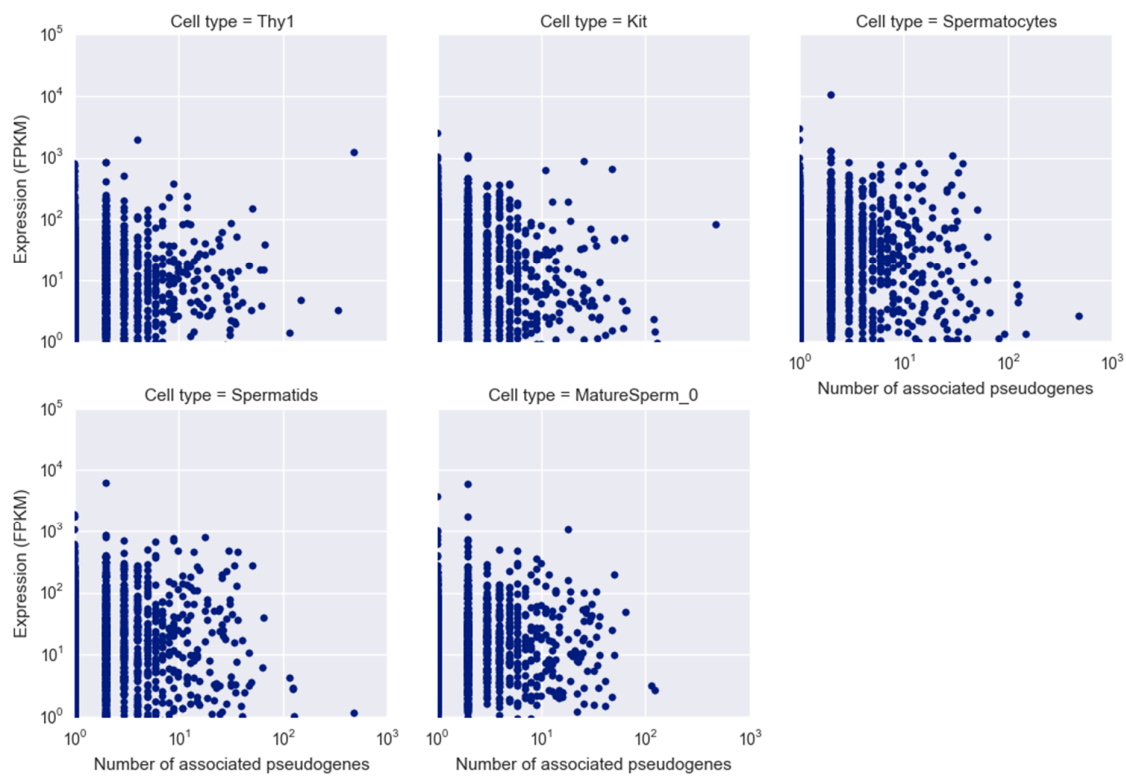

**Supplementary Figure 4. C.** Transcriptional activity of a gene vs the number of its associated pseudogenes during spermatogenesis.

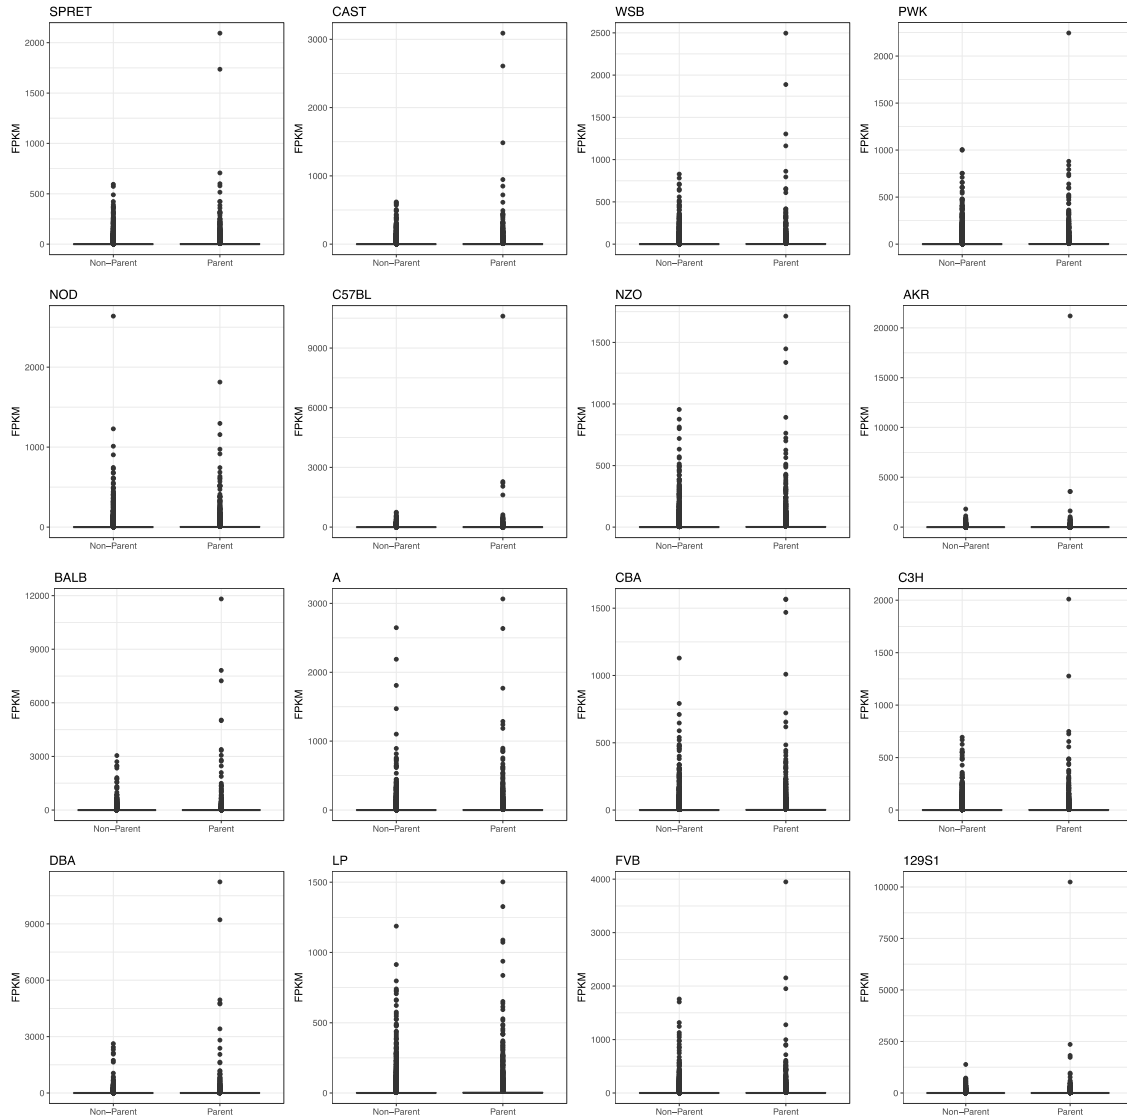

**Supplementary Figure 4. D** – Average expression levels in adult mouse brain for pseudogene parent and non-parent protein coding genes. The number of samples in each strain is C57BL (parent = 10520, non-parent = 68845), SPRET (parent = 9634, non-parent = 69897), PWK (parent = 9588, non-parent = 70254), CAST (parent = 9706, non-parent = 70441), WSB (parent = 9769, non-parent = 68666), NOD<sub>λ</sub> (parent = 10273, non-parent = 68647), NZO<sub>λ</sub> (parent = 10592, non-parent = 69111), AKR<sub>λ</sub> (parent = 10373, non-parent = 69040), BALB<sub>λ</sub> (parent = 10414, non-parent = 68924), A<sub>λ</sub> (parent = 10386, non-parent = 69019), CBA<sub>λ</sub> (parent = 10240, non-parent = 68833), C3H<sub>λ</sub> (parent = 10250, non-parent = 68863), DBA<sub>λ</sub> (parent = 10300, non-parent = 68870), LP<sub>λ</sub> (parent = 10250, non-parent = 68795), FVB<sub>λ</sub> (parent = 10177, non-parent = 68770), 129S1<sub>λ</sub> (parent = 10226, non-parent = 68933). Centre line indicates the median value, box limits are the upper and lower quartiles, whiskers are 1.5x interquartile range, and the points are the outliers.

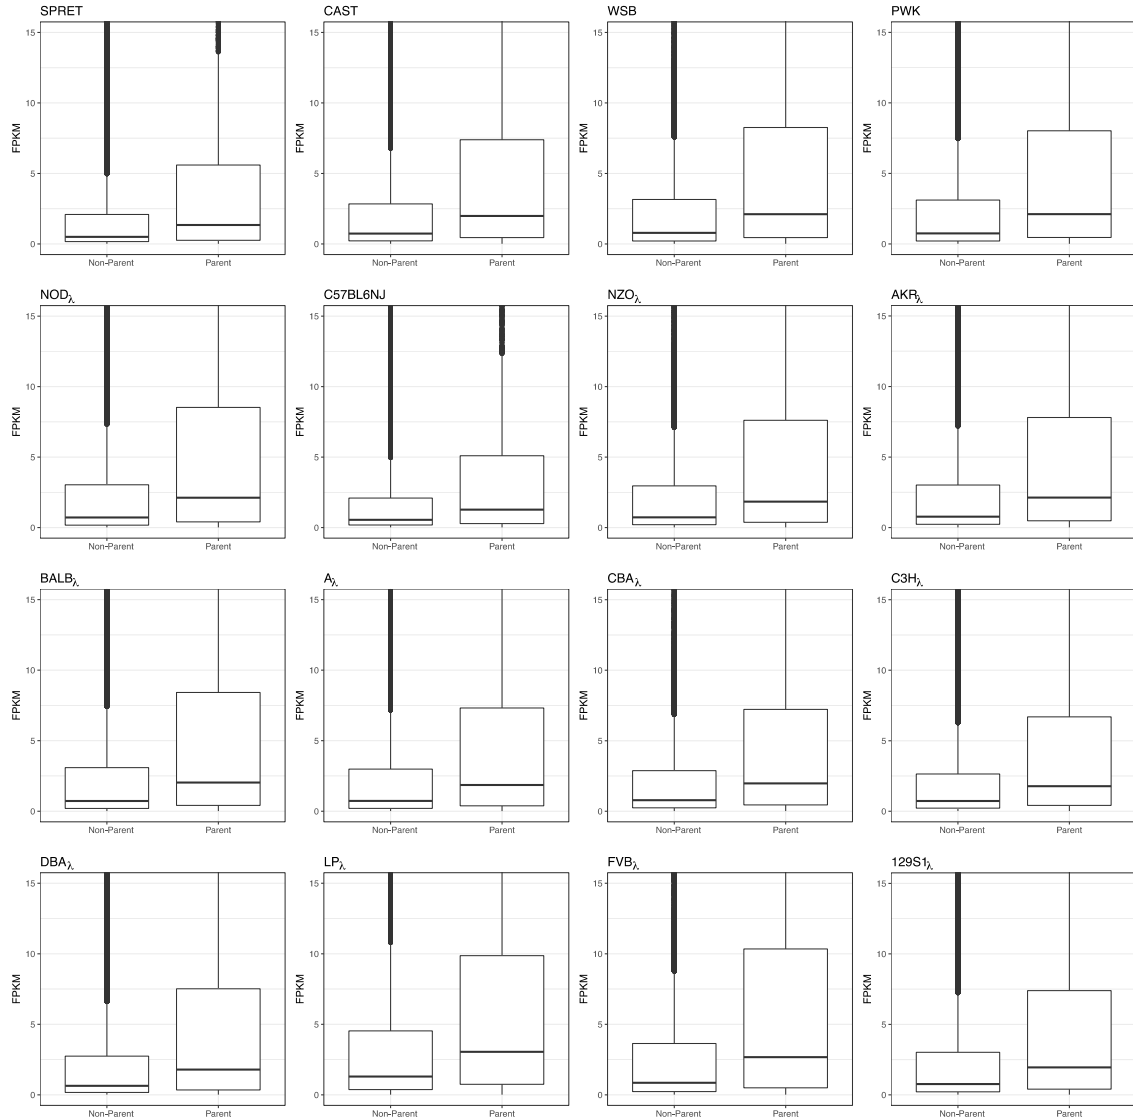

**Supplementary Figure 4. E** – zoomed in version of **Supplementary Figure 4D**. Average expression levels in adult mouse brain for pseudogene parent and non-parent protein coding genes. Centre line indicates the median value, box limits are the upper and lower quartiles, whiskers are 1.5x interquartile range, and the points are the outliers. The number of samples in each strain is C57BL (parent = 10520, non-parent = 68845), SPRET (parent = 9634, non-parent = 69897), PWK (parent = 9588, non-parent = 70254), CAST (parent = 9706, non-parent = 70441), WSB (parent = 9769, non-parent = 68666), NOD $\lambda$  (parent = 10273, non-parent = 68647), NZO $\lambda$  (parent = 10592, non-parent = 69111), AKR $\lambda$  (parent = 10373, non-parent = 69040), BALB $\lambda$  (parent = 10414, non-parent = 68924), A $\lambda$  (parent = 10386, non-parent = 69019), CBA $\lambda$  (parent = 10240, non-parent = 68833), C3H $\lambda$  (parent = 10250, non-parent = 68863), DBA $\lambda$  (parent = 10300, non-parent = 68870), LP $\lambda$  (parent = 10250, non-parent = 68795), FVB $\lambda$  (parent = 10177, non-parent = 68770), 129S1 $\lambda$  (parent = 10226, non-parent = 68933).

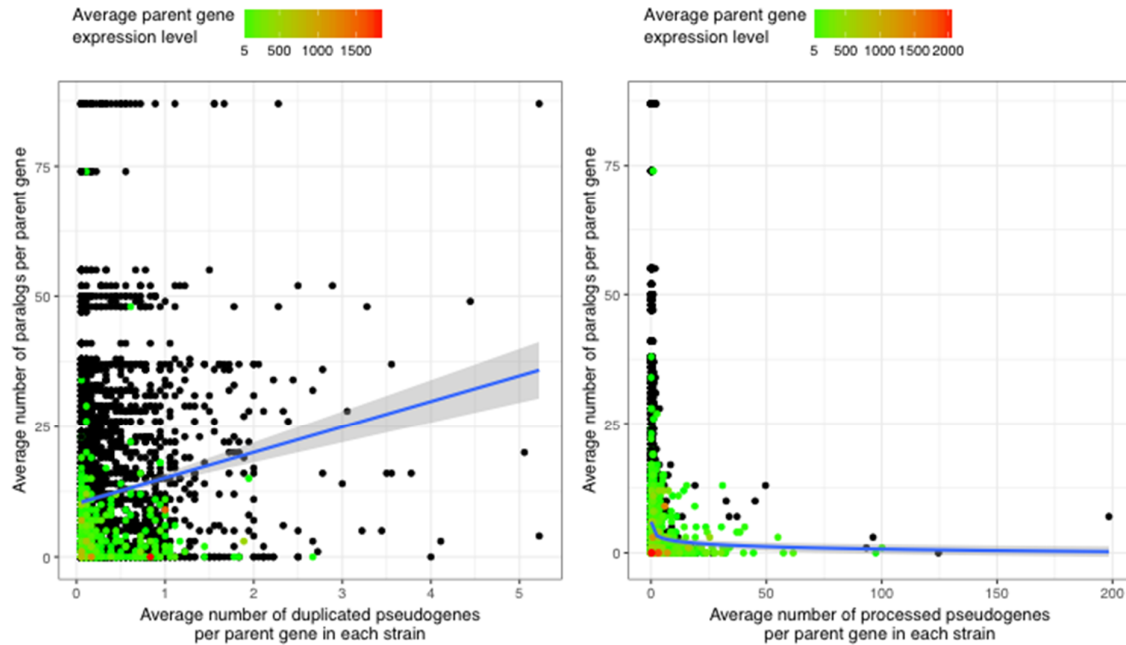

**Supplementary Figure 5. A** – Relationship between the number of pseudogenes and functional paralogs for a given parent gene (left – duplicated pseudogenes, right – processed pseudogenes). The number of parent genes associated with processed pseudogenes in strains is 11,571, and the number of parent genes associated with duplicated pseudogenes in strains is 3,758. The average number of pseudogenes per parent per strain was obtained by dividing the total number of pseudogenes across all strains by the total number of strains (18). Fitting lines show a vague correlation between the number of functional vs. disabled copies of a gene, with a linear fit for duplicated pseudogenes ( $y=4.93x+10.13$ ) and a negative logarithmic fit ( $y=-0.59\log(1/x)+3.99$ ) for processed pseudogenes. The gray area is the  $\pm$  SD (standard deviation) of the fitting curve. The dots are coloured by the average expression level of the parent gene in brain adult tissue in the range described in the heat scale above each figure. The black dots correspond to protein coding gene with an average expression level across the strains lower than 5 FPKM.

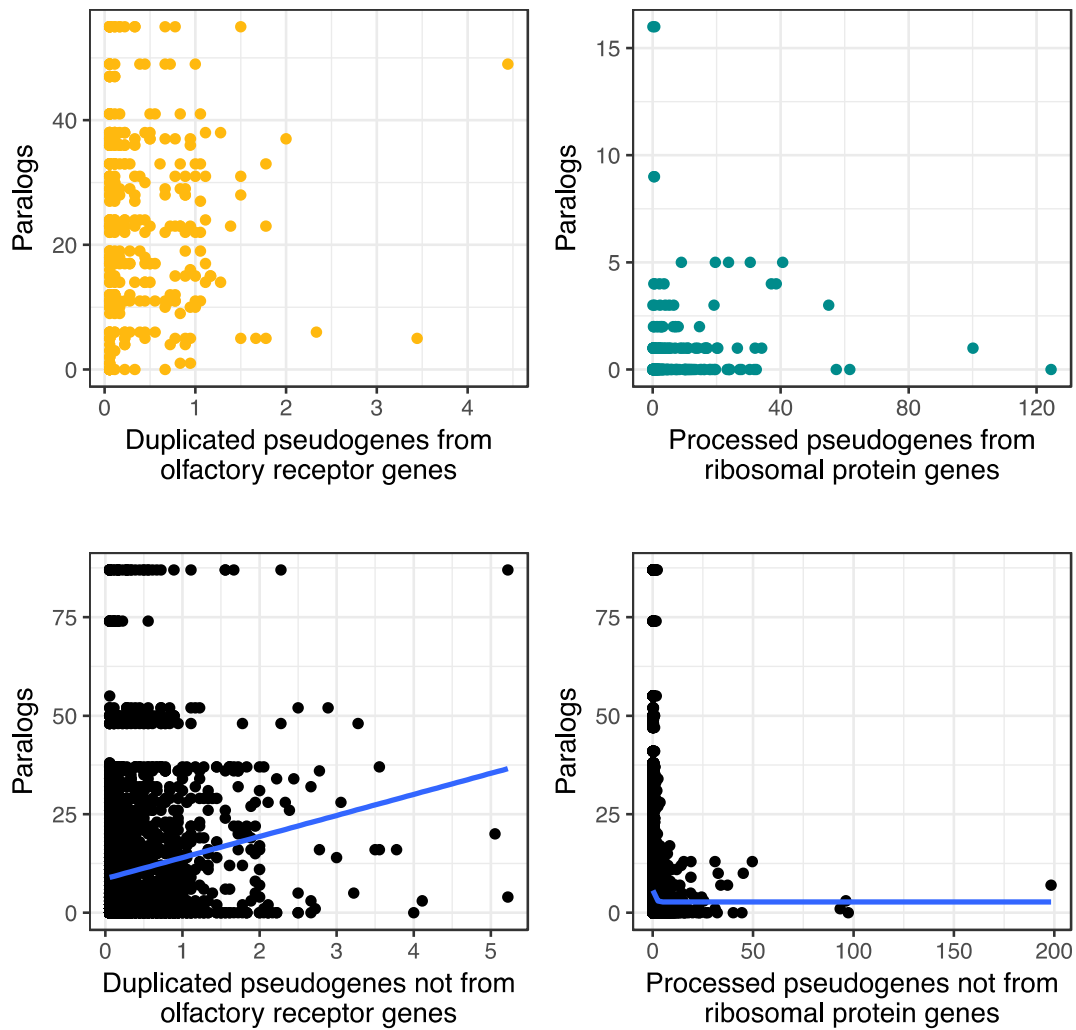

**Supplementary Figure 5. B** – Relationship between the number of pseudogenes and functional paralogs for a given parent gene (left – duplicated pseudogenes, right – processed pseudogenes) for olfactory receptors (OR) and ribosomal protein (RP) derived pseudogenes. The top left plot shows the distribution of OR pseudogenes vs paralogs of olfactory receptors per strain. Correspondingly, the top right plot shows the distribution of RP pseudogenes vs paralogs of ribosomal proteins per strain. The bottom plots show the distribution of the pseudogenes and paralogs that are not generated from olfactory receptor or ribosomal proteins. Correlation lines are drawn in blue.

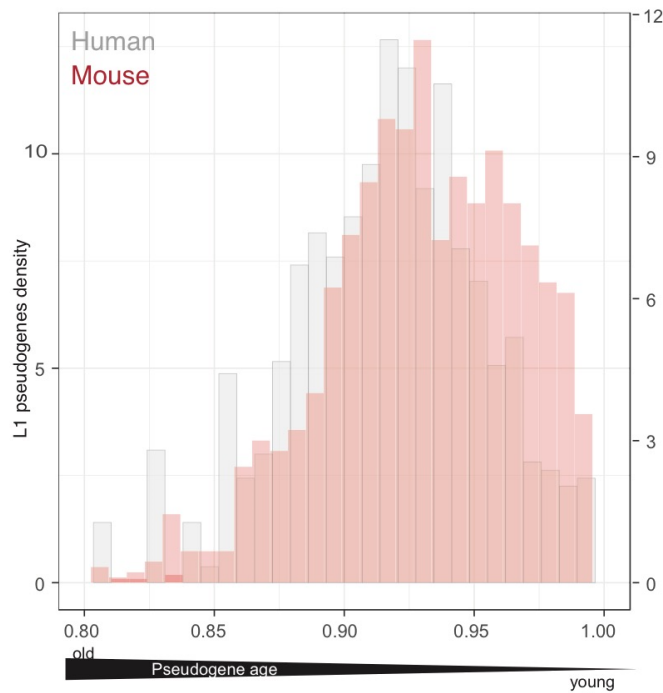

**Supplementary Figure 5. C** – Distribution of L1-flanked pseudogenes (y-axis) as function of age (x-axis) in human (n=8,081) and mouse (n=9,979). The pseudogene age is approximated as DNA sequence similarity to the parent gene.

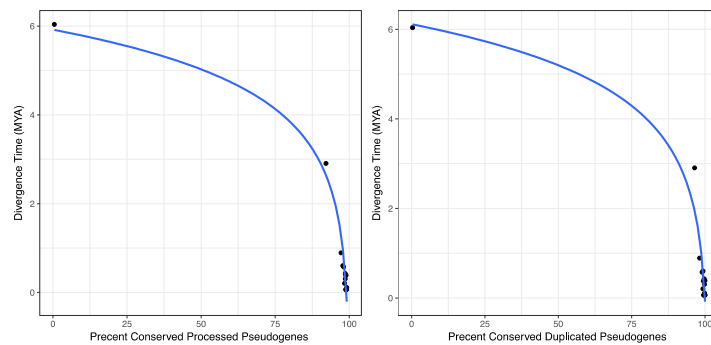

**Supplementary Figure 6.** Distribution of conserved pseudogenes as function of biotype and strain divergence. The “Misc” biotype includes unitary pseudogenes as well as pseudogene for which the biotype could not be accurately determined. All three pseudogene classes follow a logarithmic curve with respect to the strain divergence times, with the best fit being observed for processed pseudogenes.

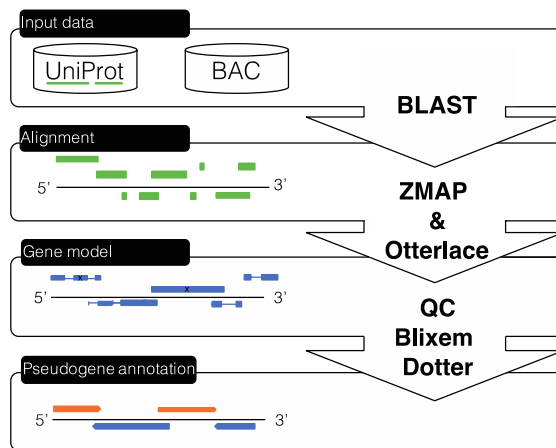

**Supplementary Figure 7.** Manual annotation curation workflow as previously described in Pei *et al.* (2012).

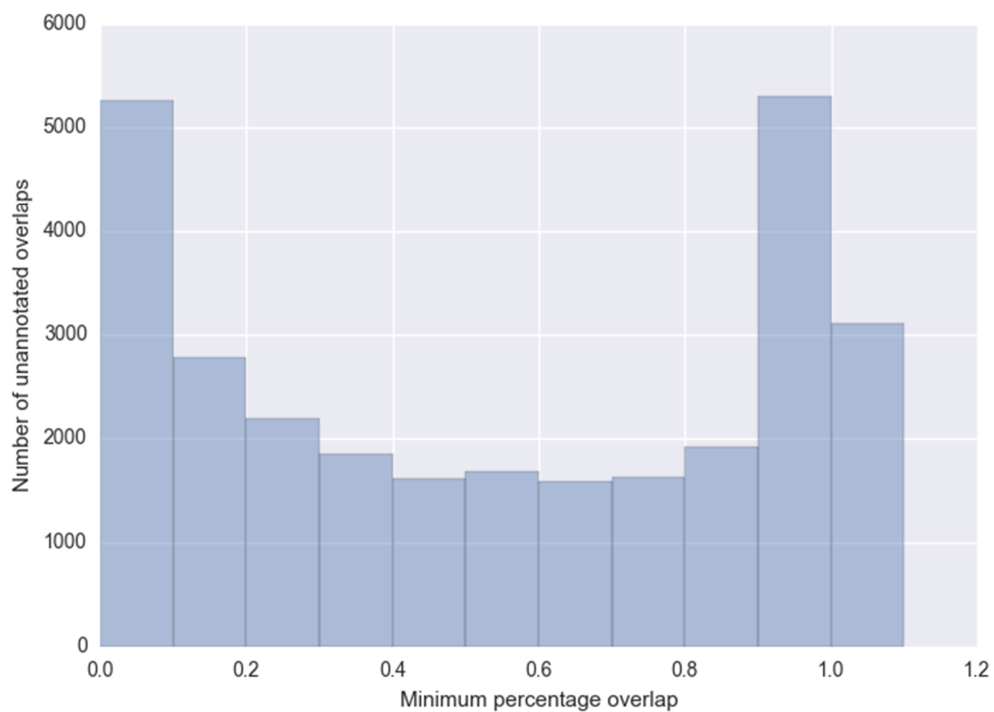

**Supplementary Figure 8.** Histogram of percentage overlap for lower of the reciprocal overlap cut-offs. Associated data is available from **Supplementary data 8**.

## Supplementary Tables

**Supplementary Table 1.** Reference genome pseudogene annotation in mouse and human.

| Organism | Manual curation (M) | PseudoPipe* (PP) | RetroFinder* (RF) | Union PP&RF | Intersection M&PP (%) |
|----------|---------------------|------------------|-------------------|-------------|-----------------------|
| Mouse    | 10,524              | 18,659           | 18,467            | 26,103      | 8,786 (83.5)          |
| Human    | 14,650              | 15,978           | 15,474            | 22,396      | 13,177 (89.9)         |

\*Chromosomal assembled DNA only

**Supplementary Table 2.** Reference genome automatic pseudogene annotation in mouse and human.

|       | PseudoPipe (PP) |          |         | RetroFinder (RF) | PP-RF overlap |
|-------|-----------------|----------|---------|------------------|---------------|
|       | Autosomes       | Sex Chr. | Others* |                  |               |
| Mouse | 14,094          | 4,565    | 4,162   | 18,467           | 10,522        |
| Human | 14,638          | 1,341    | 2,054   | 15,474           | 9,057         |

\*Includes patches, scaffolds, and unassembled DNA.

**Supplementary Table 3.** Human and mouse pseudogene annotation summary.

|                         | Human (v25)             | Mouse (M12)             |
|-------------------------|-------------------------|-------------------------|
| <b>Total GENCODE</b>    | <b>14,650</b>           | <b>10,524</b>           |
| processed pseudogenes   | 10,725                  | 7,486                   |
| unprocessed pseudogenes | 3,400                   | 2,625                   |
| unitary pseudogenes     | 214                     | 34                      |
| polymorphic pseudogenes | 51                      | 77                      |
| ambiguous pseudogenes   | 21                      | 99                      |
| <b>Total PseudoPipe</b> | <b>15,978 (+2,054*)</b> | <b>18,659 (+4,162*)</b> |
| processed pseudogenes   | 8,081 (+ 683*)          | 9,979 (+ 559*)          |
| unprocessed pseudogenes | 2,534 (+ 550*)          | 1,929 (+ 274*)          |
| ambiguous pseudogenes   | 5,363 (+ 821*)          | 6,751 (+3,329*)         |

\*Includes patches, scaffolds, and unassembled DNA.

**Supplementary Table 4.** Mouse strains description and nomenclature. The lambda “λ” symbol indicates that a strain is belonging to the classical laboratory inbred strains group.

| Strain ID          | Description                                  | Group                               |
|--------------------|----------------------------------------------|-------------------------------------|
| PAHARI             | PAHARI/EiJ – Mus Pahari                      | Wild-derived outgroup               |
| CAROLI             | CAROLI/EiJ – Mus Caroli                      |                                     |
| SPRET              | SPRET/EiJ – Mus Spretus                      |                                     |
| PWK                | PWK/PhJ – Mus Musculus Musculus              | Wild-derived inbred strains         |
| CAST               | CAST/EiJ – Mus Musculus Castaneus            |                                     |
| WSB                | WSB/EiJ – Mus Musculus Domesticus            |                                     |
| NOD <sub>λ</sub>   | NOD/ShiLtJ – Mus Musculus Non-obese Diabetic | Classical laboratory inbred strains |
| C57BL              | C57BL/6NJ – Mus Musculus Black 6N            |                                     |
| NZO <sub>λ</sub>   | NZO/HILtJ – Mus Musculus New Zealand Obese   |                                     |
| AKR <sub>λ</sub>   | AKR/J – Mus Musculus                         |                                     |
| BALB <sub>λ</sub>  | BALB/cJ – Mus Musculus                       |                                     |
| A <sub>λ</sub>     | A/J – Mus Musculus                           |                                     |
| CBA <sub>λ</sub>   | CBA/J – Mus Musculus                         |                                     |
| C3H <sub>λ</sub>   | C3H/HeJ – Mus Musculus                       |                                     |
| DBA <sub>λ</sub>   | DBA/2J – Mus Musculus                        |                                     |
| LP <sub>λ</sub>    | LP/J – Mus Musculus                          |                                     |
| FVB <sub>λ</sub>   | FVB/NJ – Mus Musculus                        |                                     |
| 129S1 <sub>λ</sub> | 129S1/SvImJ – Mus Musculus                   |                                     |

**Supplementary Table 5:** Estimation of the total number of pseudogenes according to PseudoPipe per strain, the number of pseudogenes in each annotation confidence level, and the number of pseudogenes for each biotype group.

| Strain             | PseudoPipe predictions | Input protein coding transcripts conserved between reference & strains | %Protein coding transcripts conserved | %Pseudogenes annotated with respect to the total number of pseudogenes in reference genome | Estimate of the total number of PseudoPipe pseudogenes | Level 1 | Level 2 | Level 3 | Processed | Duplicated | Ambiguous | Unitary |
|--------------------|------------------------|------------------------------------------------------------------------|---------------------------------------|--------------------------------------------------------------------------------------------|--------------------------------------------------------|---------|---------|---------|-----------|------------|-----------|---------|
| <b>Mouse</b>       | 18659                  | 56999                                                                  | 100.00                                | 100.00                                                                                     | <b>18659</b>                                           | 8786    | 1738    | 8135    | 9980      | 1930       | 8487      | 271     |
| <b>C57BL/6NJ</b>   | 14722                  | 47145                                                                  | 82.71                                 | 79.27                                                                                      | <b>18659</b>                                           | 5615    | 993     | 6597    | 10859     | 1661       | 671       | 14      |
| PAHARI             | 12414                  | 41022                                                                  | 71.97                                 | 68.97                                                                                      | <b>18082</b>                                           | 2971    | 1254    | 6361    | 9137      | 1011       | 426       | 9       |
| CAROLI             | 13399                  | 43056                                                                  | 75.54                                 | 72.39                                                                                      | <b>18595</b>                                           | 3860    | 1224    | 6362    | 9640      | 1295       | 499       | 6       |
| SPRET              | 14170                  | 44567                                                                  | 78.19                                 | 74.93                                                                                      | <b>18998</b>                                           | 4444    | 980     | 6511    | 10137     | 1242       | 543       | 17      |
| PWK                | 14485                  | 44313                                                                  | 77.74                                 | 74.50                                                                                      | <b>19532</b>                                           | 4630    | 865     | 6668    | 10294     | 1325       | 530       | 15      |
| CAST               | 14427                  | 45527                                                                  | 79.87                                 | 76.55                                                                                      | <b>18935</b>                                           | 4694    | 1003    | 6707    | 10216     | 1549       | 625       | 15      |
| WSB                | 14202                  | 46107                                                                  | 80.89                                 | 77.52                                                                                      | <b>18405</b>                                           | 4869    | 873     | 6360    | 10168     | 1336       | 584       | 32      |
| NOD <sub>λ</sub>   | 14965                  | 45869                                                                  | 80.47                                 | 77.12                                                                                      | <b>19495</b>                                           | 5285    | 937     | 6732    | 10725     | 1589       | 625       | 11      |
| NZO <sub>λ</sub>   | 13909                  | 47417                                                                  | 83.19                                 | 79.72                                                                                      | <b>17527</b>                                           | 5592    | 1048    | 6237    | 10762     | 1465       | 637       | 14      |
| AKR <sub>λ</sub>   | 14380                  | 46662                                                                  | 81.86                                 | 78.45                                                                                      | <b>18414</b>                                           | 5289    | 996     | 6629    | 10791     | 1496       | 613       | 6       |
| BALB <sub>λ</sub>  | 14393                  | 46636                                                                  | 81.82                                 | 78.41                                                                                      | <b>18441</b>                                           | 5344    | 939     | 6728    | 10786     | 1598       | 613       | 13      |
| A <sub>λ</sub>     | 13823                  | 46760                                                                  | 82.04                                 | 78.62                                                                                      | <b>17664</b>                                           | 5295    | 997     | 6448    | 10684     | 1417       | 624       | 78      |
| CBA <sub>λ</sub>   | 14479                  | 46243                                                                  | 81.13                                 | 77.75                                                                                      | <b>18709</b>                                           | 5231    | 898     | 6713    | 10710     | 1494       | 624       | 14      |
| C3H <sub>λ</sub>   | 14400                  | 46360                                                                  | 81.33                                 | 77.95                                                                                      | <b>18560</b>                                           | 5201    | 917     | 6618    | 10665     | 1455       | 601       | 11      |
| DBA <sub>λ</sub>   | 13872                  | 46375                                                                  | 81.36                                 | 77.97                                                                                      | <b>17874</b>                                           | 5282    | 908     | 6219    | 10451     | 1335       | 609       | 11      |
| LP <sub>λ</sub>    | 13923                  | 46384                                                                  | 81.38                                 | 77.99                                                                                      | <b>17936</b>                                           | 5199    | 1015    | 6474    | 10626     | 1418       | 629       | 13      |
| FVB <sub>λ</sub>   | 14202                  | 46205                                                                  | 81.06                                 | 77.69                                                                                      | <b>18366</b>                                           | 5257    | 977     | 6460    | 10652     | 1430       | 597       | 16      |
| 129S1 <sub>λ</sub> | 13820                  | 46726                                                                  | 81.98                                 | 78.56                                                                                      | <b>17673</b>                                           | 5284    | 1042    | 6501    | 10616     | 1591       | 607       | 78      |

**Supplementary Table 6:** Distribution of numbers of conserved and unconserved pseudogene loci.

| Strain             | Unconserved | Conserved |
|--------------------|-------------|-----------|
| PAHARI             | 4216        | 442       |
| CAROLI             | 774         | 5276      |
| SPRET              | 239         | 6338      |
| PWK                | 202         | 6572      |
| CAST               | 221         | 7068      |
| WSB                | 178         | 7343      |
| NOD <sub>λ</sub>   | 210         | 8126      |
| NZO <sub>λ</sub>   | 188         | 8238      |
| AKR <sub>λ</sub>   | 161         | 7966      |
| BALB <sub>λ</sub>  | 235         | 8400      |
| A <sub>λ</sub>     | 176         | 7942      |
| CBA <sub>λ</sub>   | 152         | 8044      |
| C3H <sub>λ</sub>   | 150         | 8050      |
| DBA <sub>λ</sub>   | 159         | 7914      |
| LP <sub>λ</sub>    | 142         | 7950      |
| FVB <sub>λ</sub>   | 215         | 7883      |
| 129S1 <sub>λ</sub> | 225         | 8304      |

**Supplementary Table 7.** Enrichment of pseudogene parent gene class in essential genes. The statistical significance was calculated using a two tailed t-test.

| Pseudogenes | Genes      | Essential | Nonessential | Odds Ratio | p-Value               |
|-------------|------------|-----------|--------------|------------|-----------------------|
| Total       | Parent     | 1162      | 1061         | 1.93       | 7.7*10 <sup>-39</sup> |
|             | Non-Parent | 2050      | 3620         |            |                       |
| Processed   | Parent     | 1034      | 869          | 2.08       | 2.3*10 <sup>-43</sup> |
|             | Non-Parent | 2178      | 3812         |            |                       |
| Duplicated  | Parent     | 334       | 349          | 1.44       | 6.0*10 <sup>-6</sup>  |
|             | Non-Parent | 2878      | 4332         |            |                       |

**Supplementary Table 8.** Correlations between gene essentiality and parent gene status controlling for transcription level.

|                   | Linear Prob. Model | Probit             | Probit Marginal Effect |
|-------------------|--------------------|--------------------|------------------------|
| Parent gene (Y/N) | 0.2035<br>(0.0168) | 0.5108<br>(0.0441) | 0.1943<br>(0.016)      |
| Transcription     | 0.0003<br>(0.0001) | 0.0010<br>(0.0002) | 0.0004<br>(8.11e-05)   |

Marginal effect for probit (column 3) calculated at mean values for each independent variable. Number of observations: 7,797. Standard errors are given in parentheses. Parent gene (Y/N) is a binary categorical variable that is equal to 1 if a gene has any associated pseudogenes and 0 if not.
